# Supplementary material
Source: publisher figshare collection journal article supplement (https://gsapubs.figshare.com/articles/dataset/_/22688005)
Supplement: Supplementary file 1 [file 1]

## Sheet: Sheet1
Supplementary Table S1. Zircon U-Pb analyses and REE concentrations measured by LA-ICPMS
sample/spot	rock-type	flag	206Pbc (%)	U (ppm)	Th (ppm)	Th/U	206Pb* (ppm)	207Pb*/235U	± 1s %	206Pb*/238U	± 1s %	error corr.	206Pb*/238U age (Ma)	± Ma (1s)	206Pb*/238U age (Ma)	± Ma (1s)		ID	flag	Y	La	Ce	Pr	Nd	Sm	Eu	Gd	Tb	Dy	Ho	Er	Tm	Yb	Lu	Ti	Ti-in-zircon T (C˚)
S-508_1	UHP quartzite	rim	0.228517	217.281	21.6575	0.102991	19.0342	0.883818	3.45167	0.101736	1.37796	0.399216	624.575	8.20262	620.8	21.1		S-508-TE_1	rim low-HREE	102.6	1.34	6.69	0.53	4.89	5.41	1.89	13.61	2.183	14.94	3.02	8.88	1.326	9.73	1.721	12.8	824.51
S-508_2	UHP quartzite	rim	0.57846	249.568	31.3244	0.12969	21.5599	0.840893	5.00605	0.0999756	1.36046	0.271764	614.266	7.97106	625.7	20.4		S-508-TE_2	rim low-HREE	123	0.0039	7.34	0.087	1.95	4.05	1.492	11.05	2.21	15.8	3.93	15.5	2.99	24.8	4.41	12.9	775.845
S-508_3	UHP quartzite	rim	0.780955	193.652	22.5857	0.120511	16.7129	0.840061	5.67351	0.0996742	1.86585	0.328871	612.499	10.9022	595.9	19.9		S-508-TE_3	rim low-HREE	67.6	0.086	7.03	0.164	2.67	4.41	1.607	10.96	1.759	10.97	2.069	6.13	0.924	6.96	1.089	18.8	790.268
S-508_4	UHP quartzite	rim	0.68139	152.173	17.0227	0.115585	13.3187	0.839342	5.94509	0.101184	3.64386	0.61292	621.345	21.584	607.8	19.7		S-508-TE_4	rim low-HREE	148	0.351	8.74	0.395	4.36	6.25	2.25	14.44	2.42	18.9	4.99	20.5	4.09	38.1	6.8	16.3	814.275
S-508_5	UHP quartzite	rim	0.588637	225.116	20.4892	0.0940441	19.2532	0.83616	3.8341	0.0989668	1.36438	0.355853	608.351	7.9206	605.1	20.2		S-508-TE_5	rim low-HREE	92	1.5	11.9	1.02	7.7	6.1	1.98	12.4	2	12.8	2.72	7.96	1.18	8.26	1.205	24.5	799.511
S-508_6	UHP quartzite	rim	1.14886	280.295	35.676	0.131514	24.9447	0.836126	5.65471	0.1024	3.53063	0.624369	628.459	21.1413	601.5	20.3		S-508-TE_6	rim low-HREE	85	0.32	7.92	0.31	5.12	7.7	2.64	16.73	2.46	14.51	2.7	7.25	1.097	8.24	1.186	16.1	823.653
S-508_7	UHP quartzite	rim	1.29538	239.886	15.5214	0.0668559	20.6959	0.834246	8.17707	0.0991227	2.1803	0.266636	609.265	12.6754	609.4	12.7		S-508-TE_7	rim low-HREE	60.9	0.033	5.89	0.132	2.38	4.2	1.379	9.33	1.475	9.59	1.845	5.44	0.908	6.91	1.042	18	789.701
S-508_8	UHP quartzite	rim	0.556027	209.977	19.486	0.0958877	18.2358	0.831507	4.64193	0.100528	1.42705	0.307427	617.502	8.40319	612.7	10.9		S-508-TE_8	rim high-LREE	721	69	180	29.7	179	54.2	14.58	86.9	12.68	84.9	19.6	48.3	4.14	14.09	2.08	7.5	762.985
S-508_9	UHP quartzite	rim	1.86405	224.729	33.0355	0.151892	19.6198	0.830617	8.27214	0.0997288	1.44825	0.175076	612.819	8.46635	610.4	10.6		S-508-TE_9	rim high-LREE	199	11.8	30.4	5.29	35	12.8	3.34	20.4	3.02	20.8	4.68	14.1	2.04	11.98	1.92	7.31	763.699
S-508_10	UHP quartzite	rim	0.281994	190.863	16.3292	0.0884011	16.3308	0.824243	4.95802	0.0993154	1.83737	0.370585	610.396	10.7006	612.84	8.46		S-508-TE_10	rim high-LREE	553	45.7	71.8	15.1	110	43.3	16.7	58.6	6.59	43.9	10.17	30.9	4.32	29.8	5.32	8.6	799.511
S-508_11	UHP quartzite	rim	1.06687	178.75	17.0177	0.0983711	15.2716	0.816051	6.32944	0.0983863	3.56428	0.563127	604.945	20.5811	617.4	8.37		S-508-TE_11	rim high-LREE	114	12	56	5.9	39	16	2.02	13.4	1.74	9.8	2.34	5.9	0.83	5.53	0.8	11.4	785.656
S-508_12	UHP quartzite	rim	0.483958	209.984	22.4305	0.110374	18.0386	0.807562	4.99642	0.09951	3.54294	0.709096	611.537	20.6704	625.57	8.18		S-508-TE_12	rim high-LREE	191	58	123	28.3	172	43.1	7.8	33.1	3.89	23.4	4.78	13.6	2.02	12.7	1.77	8.9	826.209
S-508_13	UHP quartzite	rim	0.982425	195.085	20.6073	0.109147	16.5678	0.799883	8.09962	0.0978834	3.5771	0.441638	601.993	20.559	614.43	7.95		S-508-TE_13	rim high-LREE	153.6	8.7	39.1	5.3	31.7	10.8	2.32	13.2	2.05	15.82	4.52	19.4	4.41	47.8	9.8	11.12	784.474
S-508_14	UHP quartzite	rim	0.64853	233.115	22.7285	0.100743	19.5324	0.797147	4.9871	0.0968979	3.63074	0.728025	596.204	20.6757	608.73	7.9		S-508-TE_14	rim high-LREE	1750	120.8	44.9	29.9	196.3	59.4	17.81	146.1	18.21	124	32.1	75	5.16	14.42	2.13	12	795.25
																		S-508-TE_15	core	775.3	0.0005	8.49	0.054	1.3	3.04	0.17	16.6	5.61	72.6	26.98	123.4	26.09	231.6	40.51	24.1	716.141
																		S-508-TE_16	core	737	0.0204	24.97	0.213	3.35	5.02	1.372	19.32	5.52	66	23.41	114.4	26.29	253.7	49.75	14.7	713.999
																		S-508-TE_17	core	2588	0.052	131.9	0.395	6.7	13.66	3.58	62.8	18.76	235.3	86.6	408.3	89.9	841	151.7	17.1	727.726
																		S-508-TE_18	core	1075	0.042	18.7	0.138	2.33	4.54	0.627	22.43	7.59	99.9	37.32	178.4	37.6	336.4	60.25	21.8	752.461
																		S-508-TE_19	core	1259	0.041	15.09	0.246	4.01	6.78	0.798	31.36	9.97	123.4	43.57	196	39.85	350.7	59.9	18.8	730.672
																		S-508-TE_20	core	409.2	0.0026	13.86	0.0628	1.191	2.16	0.312	10.3	3.04	37.09	12.93	61.1	12.99	121.1	22.06	23.9	750.23
																		S-508-TE_21	core	101.5	0.328	9.34	0.336	5.02	8.07	2.79	18.54	2.77	16.94	3.125	8.92	1.352	10.2	1.501	17	824.937
																		S-508-TE_22	core	741	0.62	42.8	0.425	4.51	4.99	1.47	17.93	5.22	60.4	22.86	115.4	27.4	276	56.5	24.2	797.4
																		S-508-TE_23	core	1481	0.077	3.52	0.186	2.3	4.98	0.366	27.06	9.86	137.4	50.83	239.4	51.12	454.9	79.2	18.4	757.095
sample/spot	rock-type	flag	206Pbc (%)	U (ppm)	Th (ppm)	Th/U	206Pb* (ppm)	207Pb*/235U	± 1s %	206Pb*/238U	± 1s %	error corr.	206Pb*/238U age (Ma)	± Ma (1s)	206Pb*/238U age (Ma)	± Ma (1s)		ID	flag	Y	La	Ce	Pr	Nd	Sm	Eu	Gd	Tb	Dy	Ho	Er	Tm	Yb	Lu	Ti	Ti-in-zircon T (C˚)
S-510_2	UHP eclogite	high-U rim	0.39555	232.352	195.5	0.869386	20.3037	0.823282	4.19663	0.10129	3.53314	0.841899	622	20.9	612.6	18.8		S-510-TE_1	core	1662	0.0014	4.36	0.055	1.41	5.83	0.566	39.94	13.37	170.9	60.8	271.3	53.5	466.5	81.9	28	840.341
S-510_4	UHP eclogite	rim	0.0153922	198.466	1.79696	0.00935545	17.0348	0.842545	1.44493	0.099925	0.904285	0.625833	613.97	5.3	615.25	5.21		S-510-TE_2	core	1329	0.0002	4.01	0.0598	1.59	5.31	0.631	33.76	10.98	136.9	47.94	210.6	42.96	367.4	64.3	24.4	825.946
S-510_5	UHP eclogite	rim	0.00488906	189.339	1.62264	0.00885511	16.3733	0.829702	1.54203	0.100654	0.895964	0.581028	618.24	5.28	617.38	5.17		S-510-TE_3	core	1300	0.0009	3.43	0.0288	0.807	3.46	0.497	26.35	9.26	126.3	46.38	213.9	44.27	385.3	68.1	32.2	855.351
S-510_7	UHP eclogite	rim	0.368727	123.992	40.5244	0.337703	10.6418	0.819474	3.10445	0.0972775	1.34261	0.432479	598.43	7.67	599.08	7.63		S-510-TE_4	core	1084	0.0009	4.26	0.0414	1.06	3.04	0.29	22.1	7.6	96.7	35.8	169	34.1	301	52.4	24.1	824.67
S-510_9	UHP eclogite	rim	0.104987	88.8993	0.388765	0.00451858	7.19037	0.828516	1.4917	0.0998488	0.892214	0.241481	613.52	5.22	613.28	4.6		S-510-TE_5	core	1520	0.0012	4.7	0.082	2.14	6.17	0.721	38.7	12.93	158.4	55.8	244.5	49.7	433	72.9	26.7	835.326
S-510_10	UHP eclogite	rim	0.468882	43.7934	5.65129	0.133337	3.66506	0.806553	2.97047	0.0969588	0.984021	0.238211	596.56	5.61	596.86	5.52		S-510-TE_6	core	709	0.0002	3.04	0.0338	0.63	2.01	0.237	14.4	5.02	65.9	24.3	114.2	24.8	228	40.8	16.7	788.145
S-510_14	UHP eclogite	rim	0.0634634	233.792	2.22493	0.00983331	20.126	0.846995	1.58384	0.10014	0.796485	0.502884	615.23	4.67365	616.06	4.63		S-510-TE_7	core	1487	0.0014	8.5	0.0438	1.25	4.69	0.492	31.56	10.93	140.3	51.2	233.8	48.1	418.3	70.7	19.1	801.23
S-510_15	UHP eclogite	rim	0.231768	46.331	1.2185	0.0271747	4.01103	0.816999	5.32037	0.100539	1.18504	0.222737	617.564	6.97878	617.33	6.96		S-510-TE_8	core	722	0.0019	3.54	0.0369	0.92	3.15	0.469	18.3	5.81	70.7	25.3	112	23	196	33.5	20.4	807.766
S-510_16	UHP eclogite	rim	0.0100904	146.159	1.23536	0.00873329	12.6328	0.851021	1.73648	0.100597	1.03232	0.59449	617.909	6.08263	619.18	5.99		S-510-TE_9	rim	29.58	0.000982	1.731	0.0217	0.542	0.89	0.542	2.44	0.542	4.61	*0.52	2.98	0.505	3.49	0.529	10.6	746.12
S-510_17	UHP eclogite	rim	0.452364	48.3755	7.5444	0.161143	4.226	0.802311	4.92612	0.101226	1.59623	0.324034	621.588	9.45861	620.35	9.37		S-510-TE_10	rim	23.05	0.000982	0.595	0.0011	0.107	0.32	0.301	1.73	0.361	2.94	0.795	2.38	0.409	3.31	0.448	9.8	739.199
S-510_11*	UHP eclogite	high-U core	0.591495	257.537	137.734	0.552602	31.3416	1.45405	4.46435	0.140753	3.52646	0.789915	848.918	28.0548	881.8	27.9		S-510-TE_11	rim	15.58	0.00062	1.777	0.0096	0.217	0.367	0.247	1.22	0.265	2.03	0.503	1.52	0.268	2.06	0.35	11.2	751.032
S-510_12*	UHP eclogite	low-U core	0.474545	409.356	450.868	1.13805	50.4417	1.42858	4.07577	0.142696	3.51581	0.862611	859.891	28.3102	900.1	25.6		S-510-TE_12	rim	15.21	0.042	0.638	0.0151	0.073	0.21	0.129	0.922	0.241	1.9	0.502	1.61	0.323	2.59	0.506	14.7	776.005
S-510_13*	UHP eclogite	high-U core	0.9359	106.204	27.3578	0.266166	8.13046	0.721877	8.77643	0.0882366	6.65374	0.758137	545.1	34.7892	547.4	33.8		S-510-TE_13	rim	15.9	0.146	0.75	0.043	0.275	0.442	0.309	1.48	0.251	2.24	0.513	1.66	0.24	1.98	0.301	7.9	720.668
S-510_8*	UHP eclogite	rim	1.47558	72.8539	21.1493	0.299955	6.09683	0.79019	15.6295	0.095898	6.47019	0.413973	590.3	36.5	590.4	36.2		S-510-TE_14	rim	10.64	0.000995	0.629	0.0048	0.075	0.254	0.141	0.812	0.159	1.41	0.34	1.18	0.15	1.29	0.213	7.2	712.897
S-510_6*	UHP eclogite	high-U rim	2.1697	26.0367	6.47835	0.257093	2.361	0.820703	10.588	0.103132	6.44261	0.608484	632.7	38.8	626.7	37.3		S-510-TE_15	rim	14.26	0.001058	1.119	0.0009	0.094	0.444	0.266	1.25	0.207	1.92	0.399	1.47	0.235	2.1	0.262	7.83	719.917
S-510_3*	UHP eclogite	rim	0.911922	107.722	35.5027	0.340542	9.57579	0.865786	7.95318	0.102476	6.39586	0.804189	628.9	38.3	631.3	36.1		S-510-TE_16	rim	16.3	0.118	1.15	0.036	0.284	0.275	0.19	0.96	0.232	2.06	0.514	1.67	0.288	2.21	0.347	8.7	728.877
S-510_1*	UHP eclogite	rim	0.826402	127.833	28.1679	0.227679	11.5746	0.881765	7.34505	0.104474	6.4019	0.871593	640.6	39	641.8	35		S-510-TE_17	rim	13.49	0.028	0.528	0.0143	0.095	0.264	0.181	1.1	0.227	1.92	0.422	1.32	0.223	1.65	0.254	10.8	747.782
*not used in age calculation																		S-510-TE_18	rim	25.94	0.0098	1.101	0.0091	0.144	0.526	0.353	2.04	0.4	3.38	0.814	2.56	0.395	3.02	0.464	10.7	746.954
																		S-510-TE_19	rim	13.16	0.0002	3.048	0.034	0.71	0.906	0.459	1.57	0.25	1.83	0.401	1.28	0.209	1.47	0.219	14.9	777.278
																		S-510-TE_20	rim	13.57	0.00098	4.09	0.029	0.32	0.553	0.294	1.3	0.211	2.01	0.408	1.35	0.211	1.71	0.243	10.2	742.716
																		S-510-TE_21	rim	13.2	0.00032	3.94	0.0196	0.282	0.365	0.226	1.03	0.22	1.82	0.378	1.39	0.225	1.77	0.272	12.8	763.145
																		S-510-TE_22	rim	11.54	0.098	0.883	0.0097	0.122	0.209	0.168	0.875	0.183	1.58	0.338	1.2	0.191	1.46	0.259	8.26	724.444
																		S-510-TE_23	rim	30.3	0.0045	1.003	0.0241	0.443	0.77	0.45	2.61	0.537	4.17	*0.52	3.23	0.514	4.09	0.603	17.6	793.222
																		S-510-TE_24	rim	15.11	0.02	0.827	0.0195	0.226	0.395	0.246	1.2	0.236	1.81	0.5	1.52	0.219	1.84	0.267	10.3	743.577
																															*average values of rims

## Sheet: G50998
Ganade, C.E., et al., 2023, Fast exhumation of Earth’s earliest ultrahigh-pressure rocks in the West Gondwana orogen, Mali: Geology, https://doi.org/10.1130/G50998.1.
